# Supplementary material
Source: PubMed Central journal article supplement (PMC8424470)
Supplement: jamainternmed-e212363-s001.pdf [file jamainternmed-e212363-s001.pdf]

## Supplemental Online Content

Salazar JW, Claytor JD, Habib AR, Guduguntla V, Redberg RF. Gender, race, ethnicity, and sexual orientation of editors at leading medical and scientific journals: a cross-sectional survey. *JAMA Intern Med*. Published online June 11, 2021. doi:10.1001/jamainternmed.2021.2363

### **eAppendix. Survey Invitation and Survey eFigure. Flow Chart of Survey Population and Respondents**

This supplemental material has been provided by the authors to give readers additional information about their work.

## **eAppendix: Survey Invitation and Survey**

### **Survey Invitation**

Dear Editor,

We are conducting a survey study of editor diversity at 25 Top Medical and Scientific Journals. We would like you to participate in this study. You were selected since you are an editor at one of these journals.

If you choose to be in the study, you will complete an online survey on basic demographics including gender and race/ethnicity (link below), which can be done easily on a computer or cell phone. It will take about **2-3 minutes to complete**.

You can skip questions by selecting "prefer to not answer" or stop the survey at any time. Your answers will be confidential and we will not share responses with anyone outside the research team. Your answers will not be linked to your journal and we have given advance assurance of this to the Lead Editor of your journal.

This study has received IRB approval\* at UCSF. Being in this study is optional. However, we hope you consider participating since, to our knowledge, this is the first survey of its kind and could provide unique insight into the composition of a highly influential position in Medicine and Science.

**If you want to participate, click this link to start the survey:**

**Follow this link to the Survey:**

[\\${!://SurveyLink?d=Take the Survey}](#)

Or copy and paste the URL below into your internet browser:

[\\${!://SurveyURL}](#)

Please contact James Salazar ([james.salazar@ucsf.edu](mailto:james.salazar@ucsf.edu)) with questions about this study. If you have questions or concerns about your rights as a research participant, you can call the UCSF Institutional Review Board at 415-476-1814.

Thank you,

James Salazar, MD, MAS – Study Lead, UCSF Research Fellow, and JAMA IM Editorial Fellow

Rita Redberg, MD, MSc – Study Principal Investigator, UCSF Professor of Medicine, and JAMA IM Editor-in-Chief

Follow the link to opt out of future emails:

[\\${!://OptOutLink?d=Click here to unsubscribe}](#)

\*The nature of IRB approval was that this study was deemed exempt research.

**Survey**

Q1 Which term do you use to describe your current gender identity? Choose all that apply.

- Female
- Male
- Non-binary
- Transgender female
- Transgender male
- Other \_\_\_\_\_
- Prefer not to answer

Q2 How would you describe your sexual orientation? Choose all that apply.

- Asexual
- Bisexual
- Gay or lesbian
- Straight/heterosexual
- Queer
- Questioning or unsure
- Other \_\_\_\_\_
- Prefer not to answer

Q3 What is your age? \_\_\_\_\_

Q4 What is your racial or ethnic identification? (Choose one or more of the following)

- Asian
- Black or African American
- Hispanic, Latinx, or of Spanish origin
- American Indian or Native American
- Pacific Islander
- White
- Other
- Prefer not to answer

Q5 What region do you live in?

- US Northeast
- US South
- US Midwest
- US West
- Europe
- Asia
- South America
- Africa
- Australia/Oceania
- Other \_\_\_\_\_
- Prefer not to answer

Q6 What is your area of expertise?

- Allergy and Immunology
- Anesthesiology
- Basic Science
- Cardiology

- Critical Care
- Dermatology
- Diabetes and Endocrinology
- Emergency Medicine
- Family Medicine
- Gastroenterology
- General Surgery
- HIV/Infectious Diseases
- Internal Medicine
- Legal
- Nephrology
- Neurology
- Ob/Gyn & Women's Health
- Oncology
- Ophthalmology
- Orthopedics
- Otolaryngology
- Pathology & Lab Medicine
- Pediatrics
- Physical Medicine & Rehabilitation
- Plastic Surgery
- Public Health
- Pulmonary Medicine
- Psychiatry and Mental Health
- Radiology
- Rheumatology
- Urology
- Other
- Prefer to not answer

Q7 What is your principal career position?

- Faculty position in academia
- Science or medical writing/editing/publishing
- Physician (non-academic position)
- Government or nonprofit organization (research)
- Government or nonprofit organization (non-research)
- Business (non-biotech)
- Industry (non-research)
- Industry (research)
- Law
- Other: \_\_\_\_\_
- Prefer to not answer

Q8 If you have an academic position, what is your academic rank? (If no, select none)

- None
- Trainee
- Lecturer
- Instructor
- Assistant Professor
- Associate Professor
- Professor
- Other: \_\_\_\_\_
- Prefer not to answer

Q9 What is your editorial position?

- None
- Editor-in-Chief
- Deputy Editor
- Associate Editor
- Editor-at-Large
- Statistical Editor
- Editorial Fellow
- Other: \_\_\_\_\_
- Prefer not to answer

**eFigure: Flow Chart of Survey Population and Respondents**

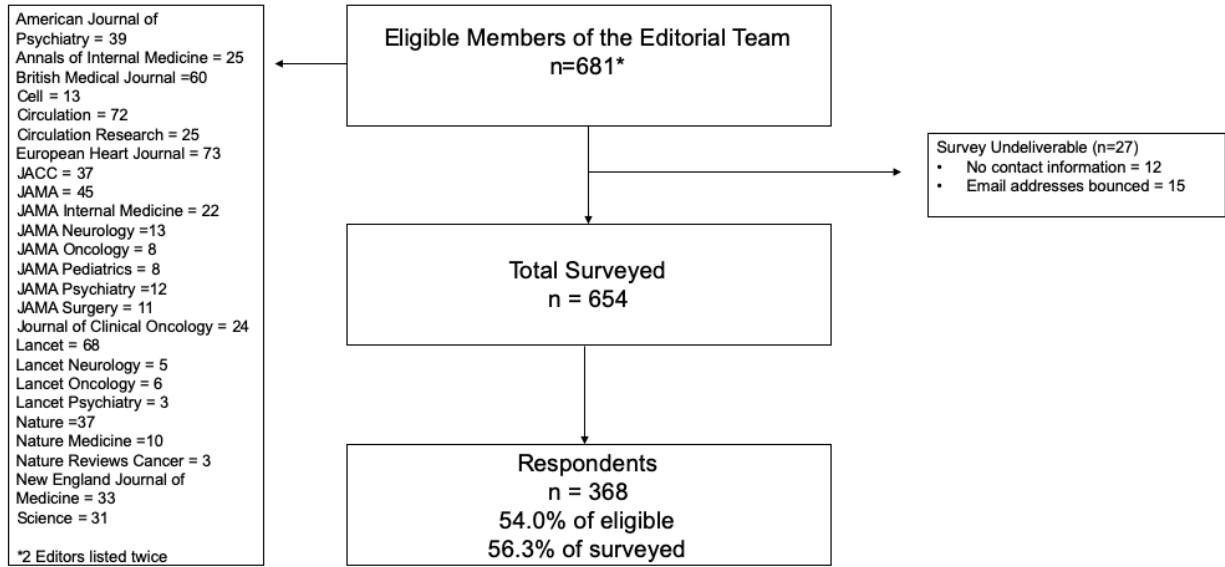

JAMA indicates Journal of the American Medical Association; JACC, Journal of the American College of Cardiology.
